# Supplementary material for: Improving the quantification of climate change hazards by hydrological models: a simple ensemble approach for considering the uncertain effect of vegetation response to climate change on potential evapotranspiration
Source: Copernicus journal article supplement (doi:10.5194/hess-27-3663-2023), 2023-10-19
Supplement: Supplementary file 1 [file hess-27-3663-2023-supplement.pdf]

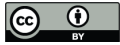

*Supplement of*

**Improving the quantification of climate change hazards by hydrological models: a simple ensemble approach for considering the uncertain effect of vegetation response to climate change on potential evapotranspiration**

**Thedini Asali Peiris and Petra Döll**

*Correspondence to:* Thedini Asali Peiris ([thediniasalipeiris@em.uni-frankfurt.de](mailto:thediniasalipeiris@em.uni-frankfurt.de))

The copyright of individual parts of the supplement might differ from the article licence.

## 1 Temperature data

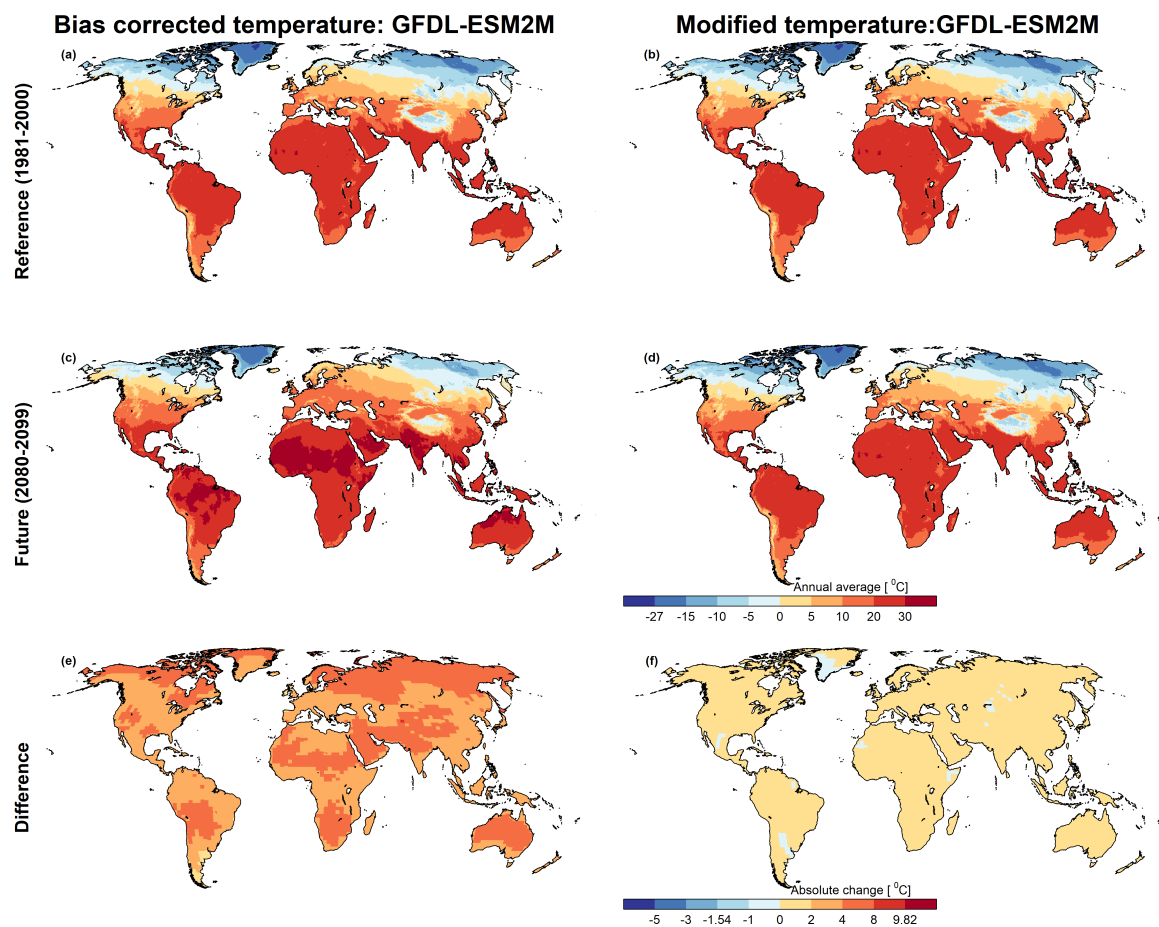

**Figure S1.** Bias-adjusted temperature and modified bias-adjusted temperature based on the GFDL-ESM2M climate model under RCP8.5. (a) and (b) annual average temperature in reference period (1981-2000) [°C], (c) and (d) annual average temperature in future period (2080-2099) [°C], (e) and (f) absolute change of temperature.

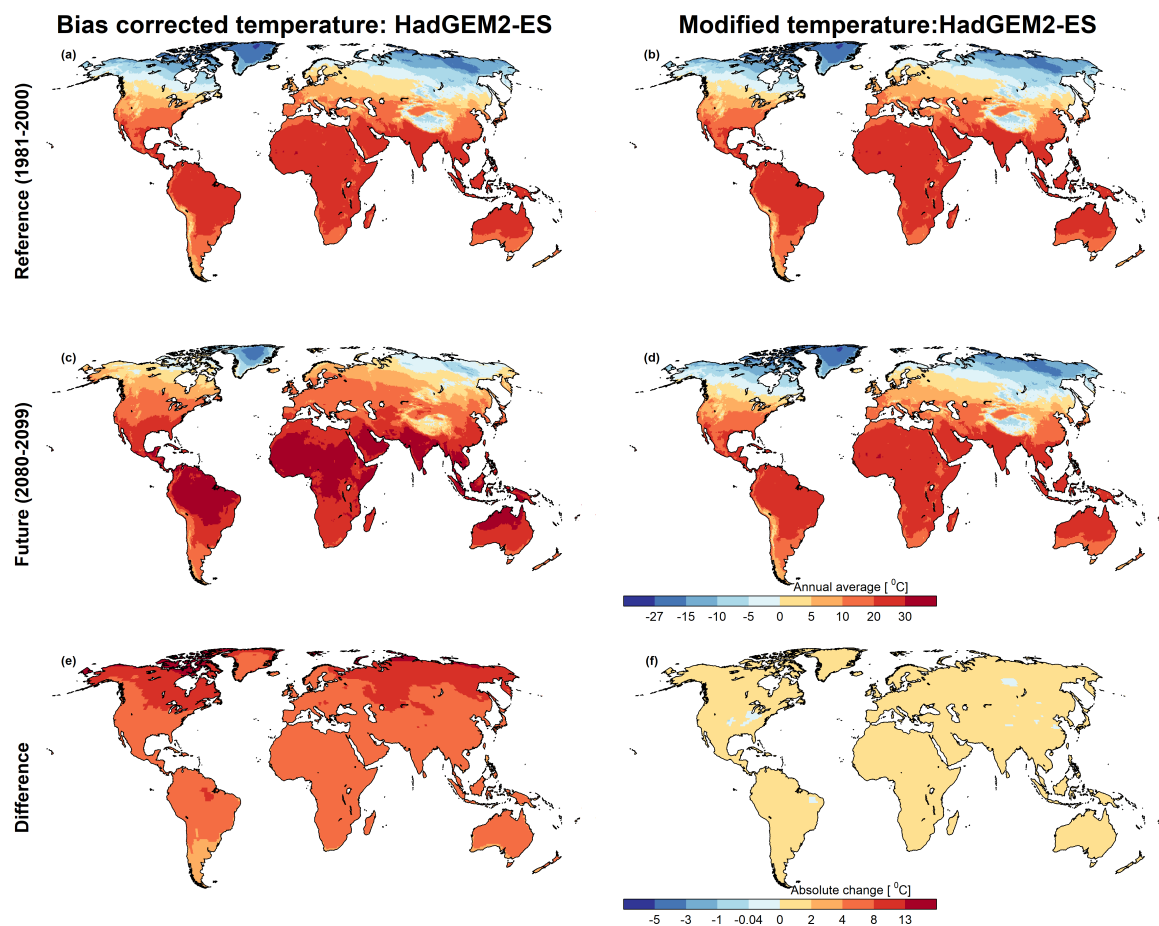

**Figure S2.** Bias-adjusted temperature and modified bias-adjusted temperature based on the HadGEM2-ES climate model under RCP8.5. (a) and (b) annual average temperature in reference period (1981-2000) [ $^{\circ}\text{C}$ ], (c) and (d) annual average temperature in future period (2080-2099) [ $^{\circ}\text{C}$ ], (e) and (f) absolute change of temperature between future and reference periods.

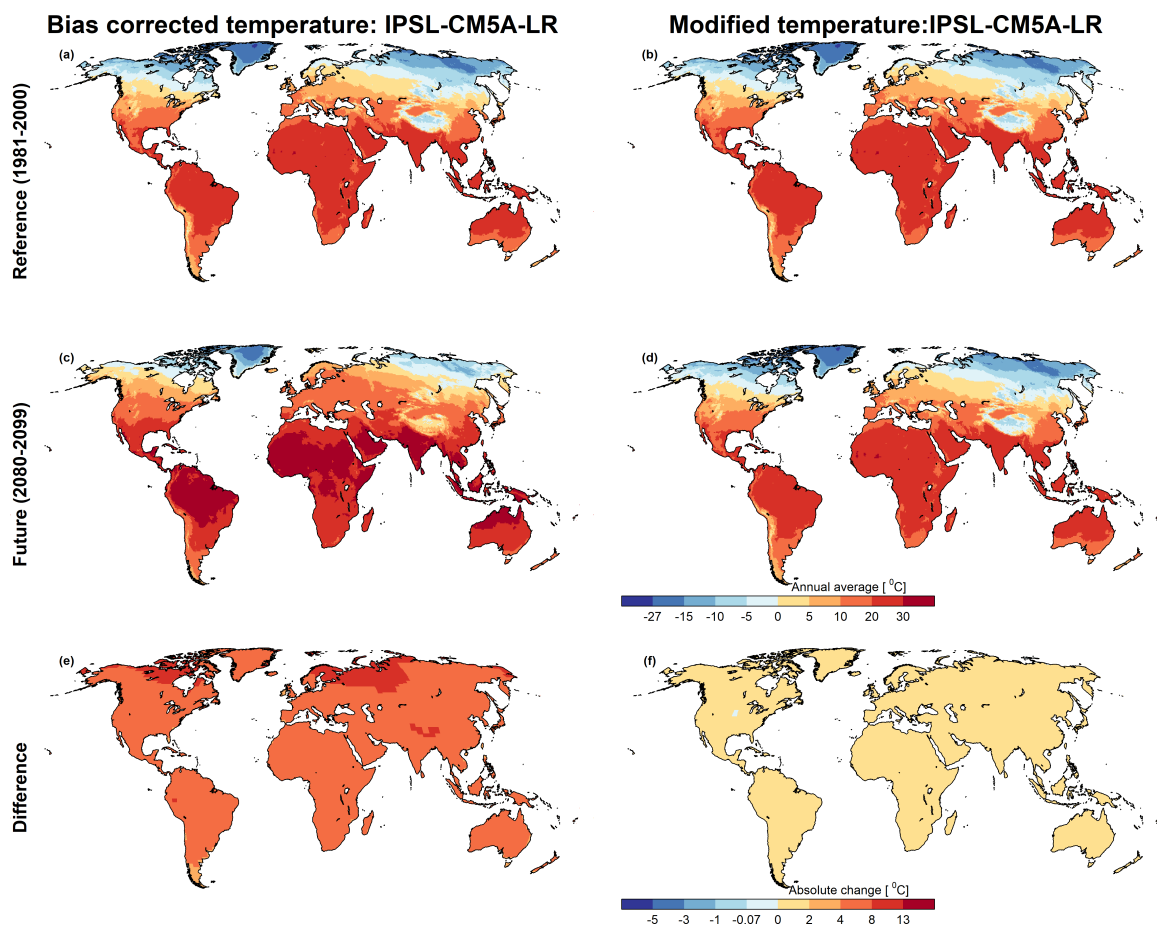

**Figure S3.** Bias-adjusted temperature and modified bias-adjusted temperature based on the IPSL-CM5A-LR climate model under RCP8.5. (a) and (b) annual average temperature in reference period (1981-2000) [°C], (c) and (d) annual average temperature in future period (2080-2099) [°C], (e) and (f) absolute change of temperature.

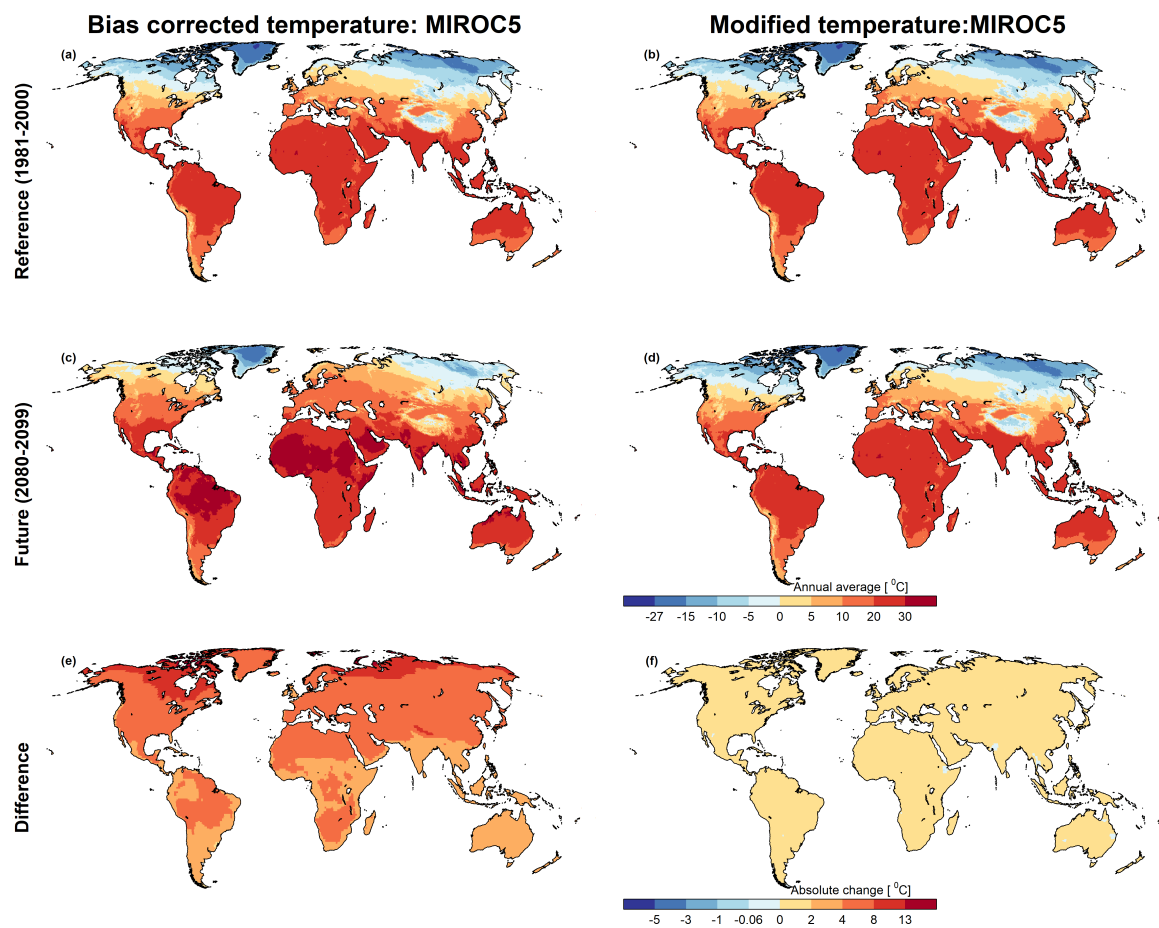

**Figure S4.** Bias-adjusted temperature and modified bias-adjusted temperature based on the MIROC5 climate model under RCP8.5. (a) and (b) annual average temperature in reference period (1981-2000) [°C], (c) and (d) annual average temperature in future period (2080-2099) [°C], (e) and (f) absolute change of temperature.

## 2 Additional results

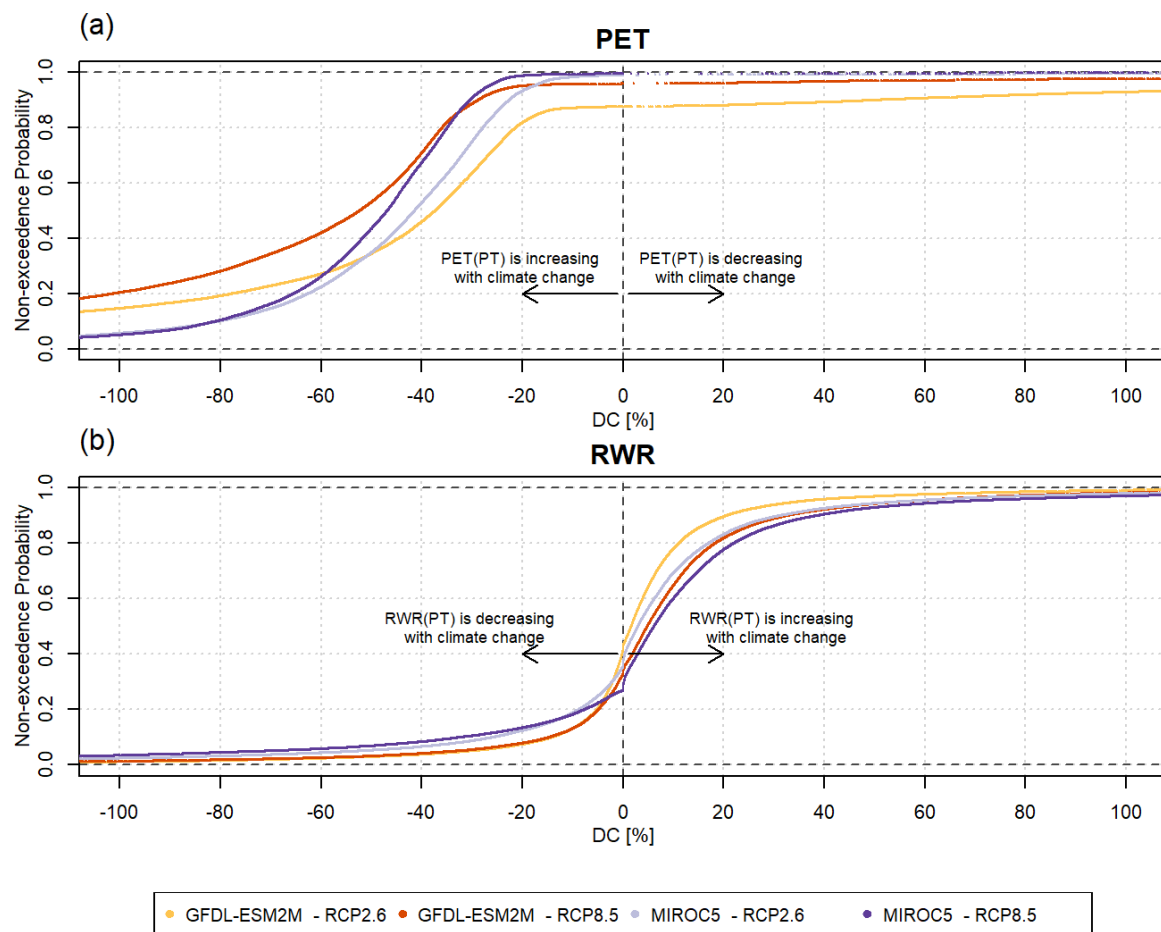

**Figure S5.** The cumulative probability distribution of the DC, i.e. the relative difference between the change computed with the PT-MA approach and the change computed with the standard PT method for (a) PET and (b) RWR. The results are based on WGHM output forced with GFDL-ESM2M and MIROC5 climate models under RCP8.5 and RCP2.6. The lighter colors correspond to RCP2.6, and darker the colors to RCP8.5. Antarctica and Greenland are excluded
